# Supplementary material for: High-melting-point crystals of poly(l-lactic acid) (PLLA): the most efficient nucleating agent to enhance the crystallization of PLLA
Source: Royal Society of Chemistry journal article supplement (doi:10.1039/c4ce02497d), 2015-01-01
Supplement: c4ce02497d1.pdf [file c4ce02497d1.pdf]

**Supporting information for**

**High-melting-point crystals of Poly(l-lactic acid)(PLLA): the Most Efficient  
Nucleating Agent to Enhance the Crystallization of PLLA**

Hai-Yan Yin<sup>a</sup>, Xin-Feng Wei<sup>a</sup>, Rui-Ying Bao<sup>a\*</sup>, Quan-Xiao Dong<sup>b</sup>, Zheng-Ying Liu<sup>a</sup>, Wei Yang<sup>a\*</sup>, B  
ang-Hu Xie<sup>a</sup>, Ming-Bo Yang<sup>a</sup>

<sup>a</sup>. College of Polymer Science and Engineering, Sichuan University, State Key Laboratory of  
Polymer Materials Engineering, Chengdu, 610065 Sichuan, China

<sup>b</sup>. Beijing Engineering Research Center of Architectural Functional Macromolecular Materials,  
Beijing Building Construction Research Institute, Beijing, People's Republic of China 100039

---

\*Corresponding authors. Tel/Fax: + 86 28 8546 0130. E-mail address: [weiyang@scu.edu.cn](mailto:weiyang@scu.edu.cn) (W. Yang) and  
[baoruiying2005@126.com](mailto:baoruiying2005@126.com) (RY Bao).

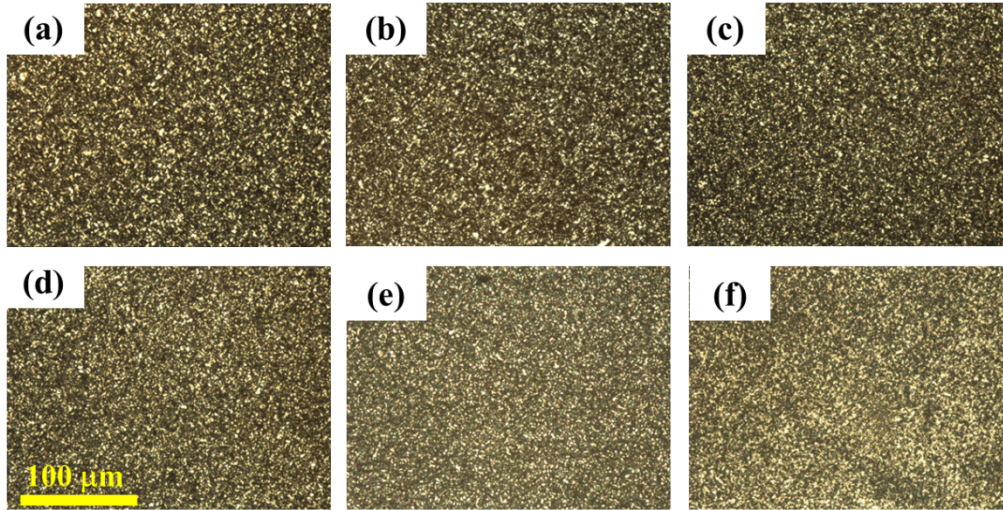

**Fig. S1.** Selected POM micrographs after completely crystallization at  $T_c$  of 140 °C for *h*PLLA-0.1 (a) *h*PLLA-0.2 (b) *h*PLLA-0.5 (c) *h*PLLA-1.0 (d) *h*PLLA-2.0 (e) and *h*PLLA-5.0 (f). The scale bar in the bottom micrograph of panel (d) represents 100  $\mu\text{m}$  and applies to all the micrographs.

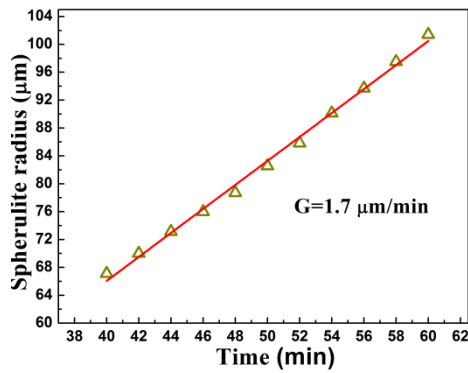

**Fig. S2.** The spherulite radius as a function of time for neat *l*PLLA at  $T_c = 140$  °C, the sample was first melting at 180 °C for 3 min and then cooled to 140 °C at 100 °C/min

Based on the DSC data, the isothermal crystallization kinetics of PLLA in the blends crystallized at 140 °C were analyzed by the Avrami equation as follows:

$$1 - X_t = \exp[-k(T)t^n] \quad (1)$$

where  $n$  is the Avrami index and  $K(T)$  is the overall rate constant. The linear form of

eq 1 can be stated as:

$$\ln[-\ln(1 - X_t)] = \ln k(T) + n \ln t \quad (2)$$

$k(T)$  and  $n$  can be estimated from the linear fitting of  $\ln[-\ln(1 - X_t)]$  vs  $\ln t$ . To ensure the accuracy of the Avrami analysis, the data in a limited conversion range (3 – 30%) was employed for fitting. The obtained data were shown in Fig.S3 and Table.S1.

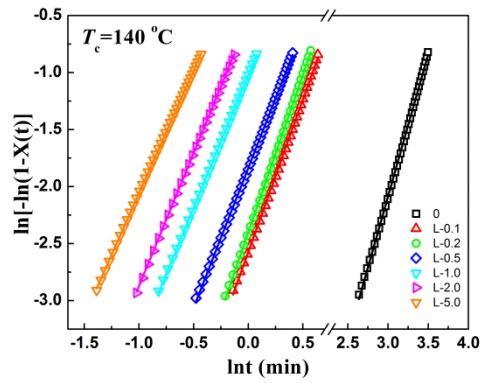

**Fig. S3.** Avrami plots of  $\ln[-\ln(1 - X_t)]$  versus  $\ln t$  for neat PLLA and the blends at  $T_c$  of 140 °C

**Table S1** Values of Avrami parameters for neat PLLA and its blends at  $T_c$  of 140 °C

| Sample Code        | $n$ | $\ln k(T)$ ( $\text{min}^{-n}$ ) |
|--------------------|-----|----------------------------------|
| <i>l</i> PLLA      | 2.8 | -9.57                            |
| <i>h</i> PLLA-0.1  | 2.7 | -2.57                            |
| <i>h</i> PLLA -0.2 | 2.8 | -2.40                            |
| <i>h</i> PLLA -0.5 | 2.4 | -1.83                            |
| <i>h</i> PLLA -1.0 | 2.3 | -1.02                            |
| <i>h</i> PLLA -2.0 | 2.3 | -0.54                            |
| <i>h</i> PLLA -5.0 | 2.2 | 0.96                             |
